# Supplementary material for: Cathelicidin Suppresses Colon Cancer Metastasis via a P2RX7-Dependent Mechanism
Source: PubMed Central journal article supplement — Mol Ther Oncolytics. 2019 Jan 29;12:195–203. doi: 10.1016/j.omto.2019.01.004 (PMC6389776; doi:10.1016/j.omto.2019.01.004), 2019-01-29
Supplement: mmc1.pdf [file mmc1.pdf]

**OMTO, Volume 12**

**Supplemental Information**

**Cathelicidin Suppresses Colon Cancer**

**Metastasis via a P2RX7-Dependent Mechanism**

**Jiani Wang, Michelle Cheng, Ivy K.M. Law, Christina Ortiz, Mingjun Sun, and Hon Wai Koon**

S1 Figure

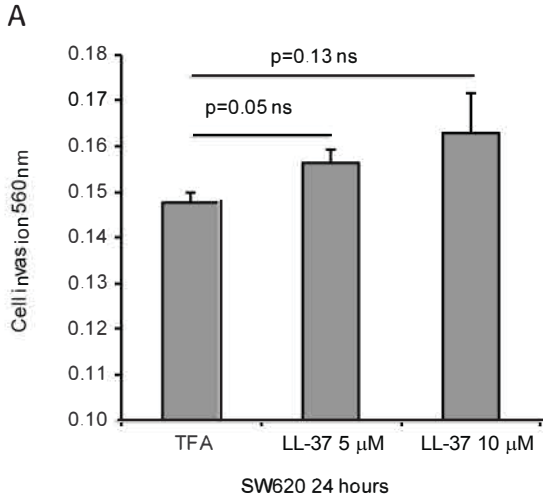

**B**

HT29

| (pg/ml)        | TFA                  | LL37                  |                       |                       |
|----------------|----------------------|-----------------------|-----------------------|-----------------------|
|                |                      | 1 $\mu$ M             | 5 $\mu$ M             | 10 $\mu$ M            |
| MMP1           | 77.96 $\pm$ 5.19     | 96.46 $\pm$ 22.45     | 64.04 $\pm$ 5.59      | 75.86 $\pm$ 7.38      |
| TIMP1          | 2168.46 $\pm$ 190.77 | 2248.87 $\pm$ 233.29  | 2517.51 $\pm$ 375.07  | 2729.54 $\pm$ 426.82  |
| TIMP2          | 793.47 $\pm$ 16.91   | 1153.31 $\pm$ 112.30* | 1330.89 $\pm$ 151.72* | 1558.96 $\pm$ 168.39* |
| TGF- $\beta$ 1 | 10.44 $\pm$ 0.84     | 15.20 $\pm$ 2.83      | 9.93 $\pm$ 1.35       | 11.63 $\pm$ 1.72      |
| VEGF           | 353.66 $\pm$ 4.36    | 534.60 $\pm$ 60.72*   | 512.36 $\pm$ 46.78*   | 511.33 $\pm$ 51.16*   |

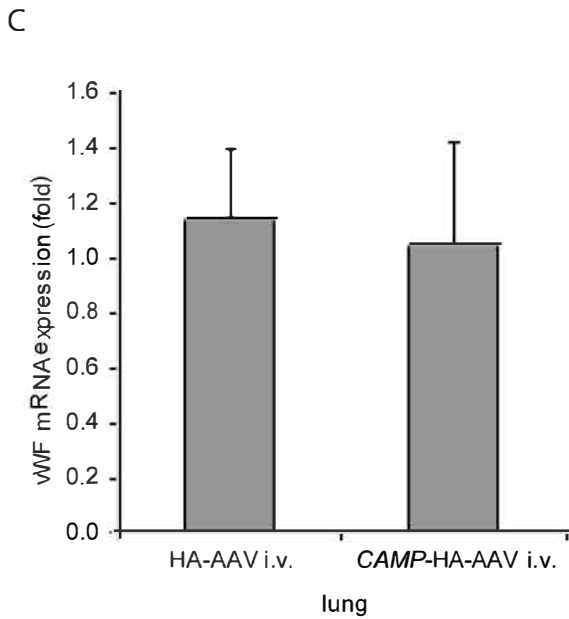

SW620

| (pg/ml)        | TFA                  | LL37                 |                       |                       |
|----------------|----------------------|----------------------|-----------------------|-----------------------|
|                |                      | 1 $\mu$ M            | 5 $\mu$ M             | 10 $\mu$ M            |
| MMP1           | 31.51 $\pm$ 0.38     | 35.49 $\pm$ 1.93     | 34.69 $\pm$ 1.32*     | 37.00 $\pm$ 2.37*     |
| TIMP1          | 1319.95 $\pm$ 35.87  | 1571.43 $\pm$ 84.89* | 1555.83 $\pm$ 106.05* | 1579.85 $\pm$ 62.79*  |
| TIMP2          | 7266.35 $\pm$ 338.18 | 7389.73 $\pm$ 518.3  | 7958.51 $\pm$ 640.92  | 9695.52 $\pm$ 1372.38 |
| TGF- $\beta$ 1 | 268.77 $\pm$ 12.22   | 246.11 $\pm$ 26.70   | 263.59 $\pm$ 23.66    | 219.35 $\pm$ 25.80    |
| VEGF           | 279.95 $\pm$ 6.55    | 304.43 $\pm$ 23.14   | 320.53 $\pm$ 30.75    | 331.56 $\pm$ 38.38    |

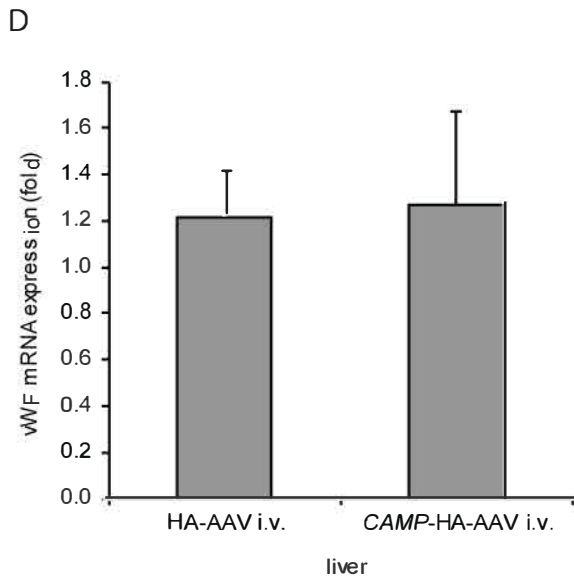

SW480

| (pg/ml)        | TFA                 | LL37                  |                       |                      |
|----------------|---------------------|-----------------------|-----------------------|----------------------|
|                |                     | 1 $\mu$ M             | 5 $\mu$ M             | 10 $\mu$ M           |
| MMP1           | 15.94 $\pm$ 0.68    | 19.22 $\pm$ 1.62      | 16.30 $\pm$ 0.30      | 23.82 $\pm$ 3.55     |
| TIMP1          | 1791.33 $\pm$ 38.95 | 2708.53 $\pm$ 132.83* | 3149.63 $\pm$ 278.65* | 2702.13 $\pm$ 90.64* |
| TIMP2          | Not determined      | Not determined        | Not determined        | Not determined       |
| TGF- $\beta$ 1 | 267.77 $\pm$ 3.17   | 325.34 $\pm$ 4.93*    | 293.43 $\pm$ 23.82    | 232.49 $\pm$ 11.34   |
| VEGF           | 418.70 $\pm$ 8.67   | 458.25 $\pm$ 61.95    | 399.00 $\pm$ 14.82    | 475.07 $\pm$ 14.18*  |

**Figure S1 Cathelicidin did not affect colon cancer cell invasion.**

(A) Cell invasion assay of SW620 cells. Results were pooled from three independent experiments. (B) HT-29, SW480, and SW620 cells were incubated with TFA or LL-37. The soluble mediators in the conditioned media were measured by ELISA. Changes in mediator levels with statistically significant differences were marked with \*. Results were pooled from six independent experiments. (C and D) vWF mRNA expression in the lungs and liver of HT-29-loaded nude mice.

## S2 Figure

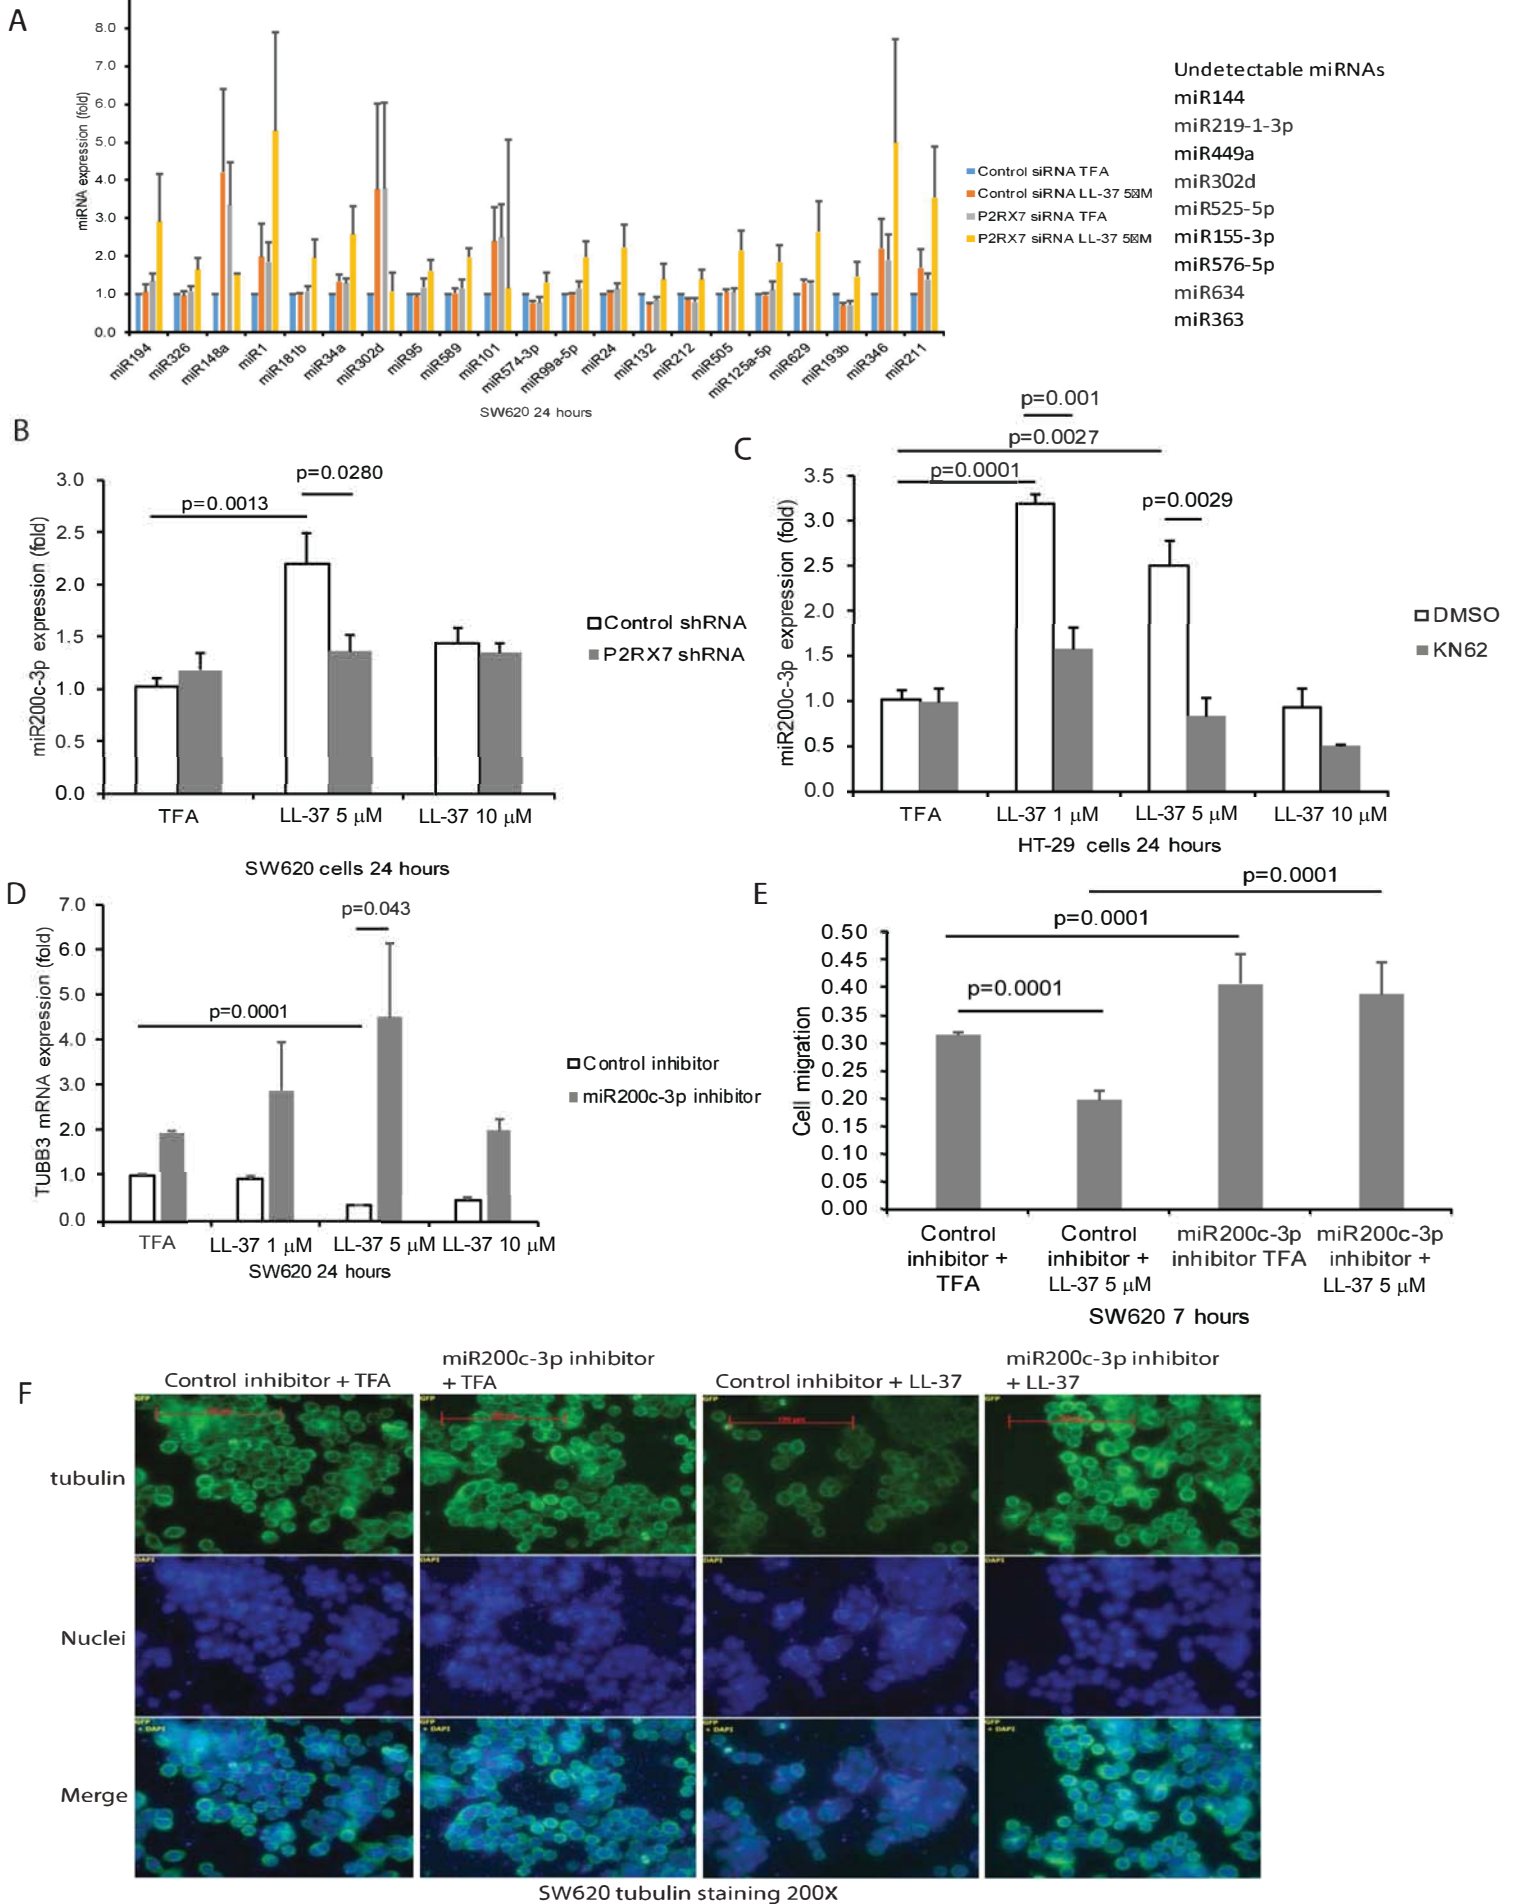

**Figure S2 miR200c is associated with cathelicidin-mediated TUBB3 inhibition.**

(A) miRNA expression was profiled by a PCR array. (B) miR200c-3p expression in SW620 cells. (C) HT-29 cells were treated with DMSO or KN62 (10 $\mu$ M) for 30 minutes, followed by exposure to LL-37. (D) SW620 cells were pretreated with control inhibitor and miR200c-3p inhibitor (50nM) overnight, followed by exposure to LL-37 (5 $\mu$ M) for 24 hours. TUBB3 mRNA expression. (E) SW620 cells were pretreated with control inhibitor or miR200c-3p inhibitor (50nM) overnight, followed by LL-37 exposure for 7 hours. Cell migration of SW620 cells. (F) Green tubulin tracker staining with blue nuclear staining in human cancer SW620 cells. SW620 cells were pretreated with control inhibitor and miR200c-3p inhibitor (50nM) overnight, followed by exposure to LL-37 (5 $\mu$ M) for 24 hours. LL-37 reduced tubulin expression in SW620 cells that was reversed by miR200-3p inhibitor.
